# Supplementary material for: Optimal strategies for learning multi-ancestry polygenic scores vary across traits
Source: PubMed Central journal article supplement (PMC10328935; doi:10.1038/s41467-023-38930-7), 2023-07-07
Supplement: 41467_2023_38930_MOESM1_ESM.pdf [file 41467_2023_38930_MOESM1_ESM.pdf]

# Supplementary Material for ‘Optimal strategies for learning multi-ancestry polygenic scores vary across traits’

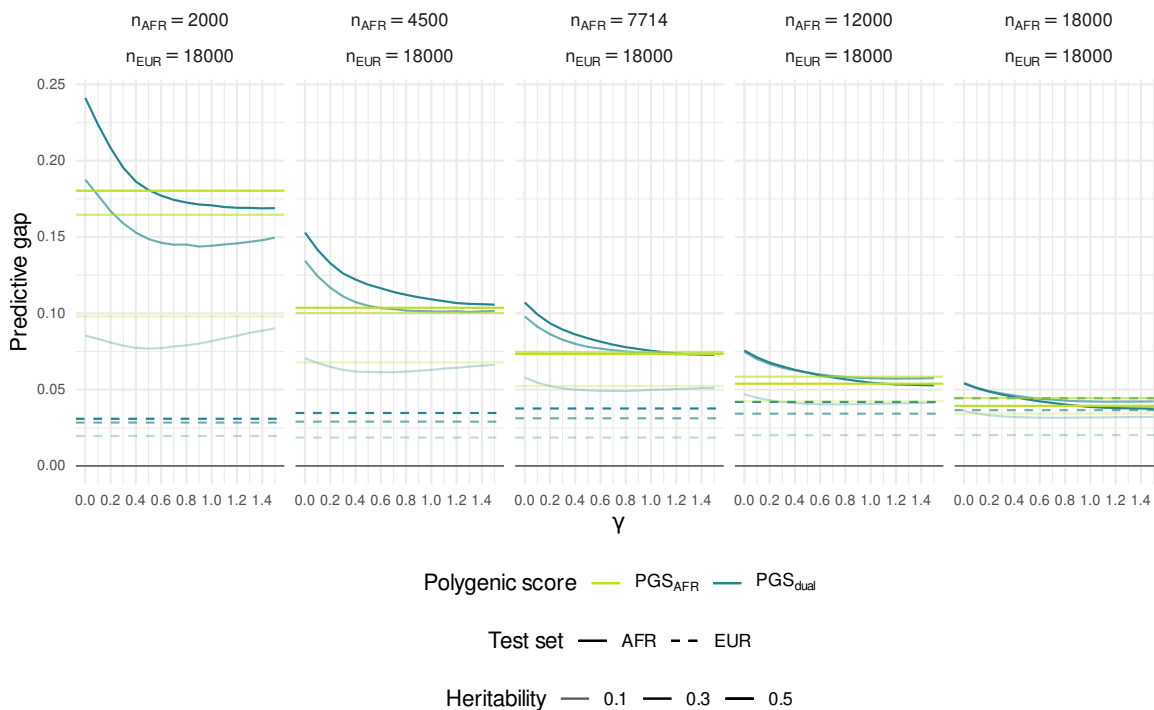

Supplementary Figure 1: **Supplementary simulation study: predictive gap against number of African-ancestry individuals in training set.** Each panel corresponds to a different number of African-ancestry training set individuals from  $n_{AFR} = 2000$  to  $n_{AFR} = 18000$ . The training sets for PGS<sub>dual</sub> (blue lines) consisted of the corresponding African-ancestry training set for PGS<sub>AFR</sub> (yellow lines), along with  $n_{EUR} = 18000$  European-ancestry individuals. The  $\gamma$  parameter represents the degree of reweighting in the dual-ancestry training set, with  $\gamma = 0$  corresponding to no reweighting, and  $\gamma = 1$  corresponding to inverse proportion reweighting (see Materials and Methods for details). Each line represents the mean predictive gap across 50 repetitions. The horizontal dashed lines correspond to the predictive gap (the difference between the optimal  $r^2$  and the observed  $r^2$  for a PGS) for European-ancestry test sets based on an unweighted LASSO, while the solid lines correspond to the predictive gap for African-ancestry test sets. The correlation of genetic effects between ancestries  $\rho$  was fixed at 0.8. The number of causal SNPs  $p_0$  was fixed at 100. The overall heritability was varied from 0.1 (lighter lines) to 0.5 (darker lines).

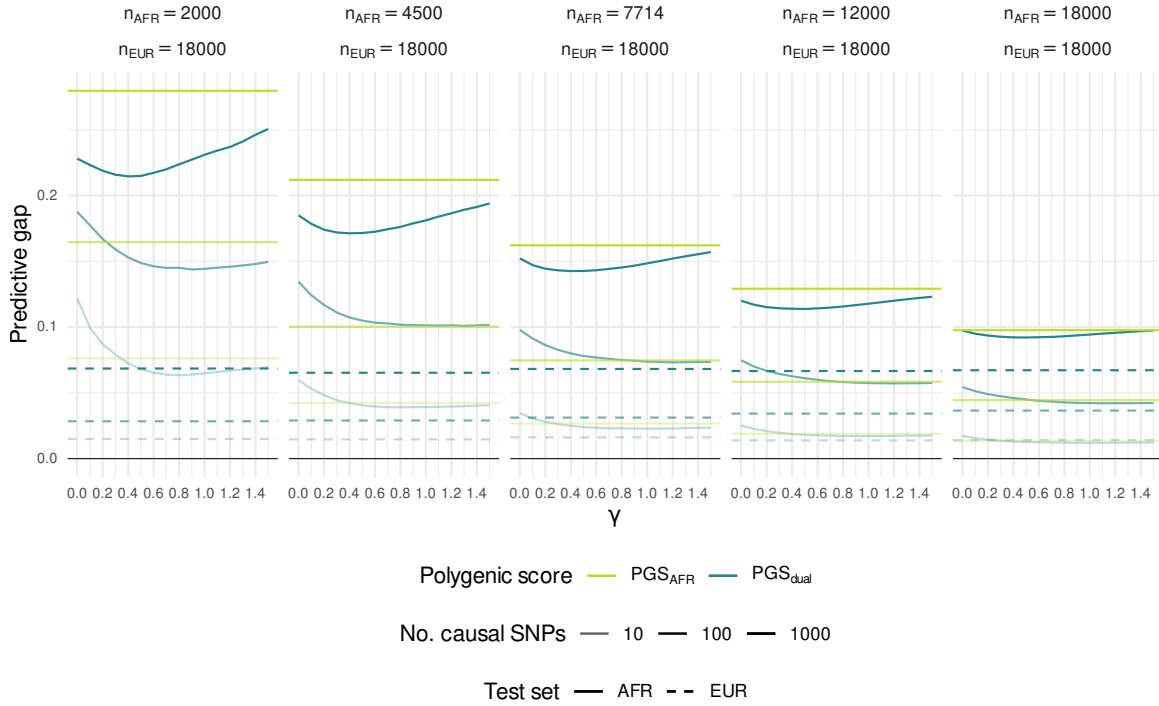

Supplementary Figure 2: **Supplementary simulation study: predictive gap against number of African-ancestry individuals in training set.** Each panel corresponds to a different number of African-ancestry training set individuals from  $n_{AFR} = 2000$  to  $n_{AFR} = 18000$ . The training sets for PGS<sub>dual</sub> (blue lines) consisted of the corresponding African-ancestry training set for PGS<sub>AFR</sub> (yellow lines), along with  $n_{EUR} = 18000$  European-ancestry individuals. Each line represents the mean predictive gap across 50 repetitions. The horizontal dashed lines correspond to the predictive gap for European-ancestry test sets based on an unweighted LASSO, while the solid lines correspond to the predictive gap for African-ancestry test sets. The correlation of genetic effects between ancestries  $\rho$  was fixed at 0.8. The overall heritability  $h_2$  was fixed at 0.3. The number of causal SNPs was varied from 10 (lighter lines) to 1000 (darker lines).

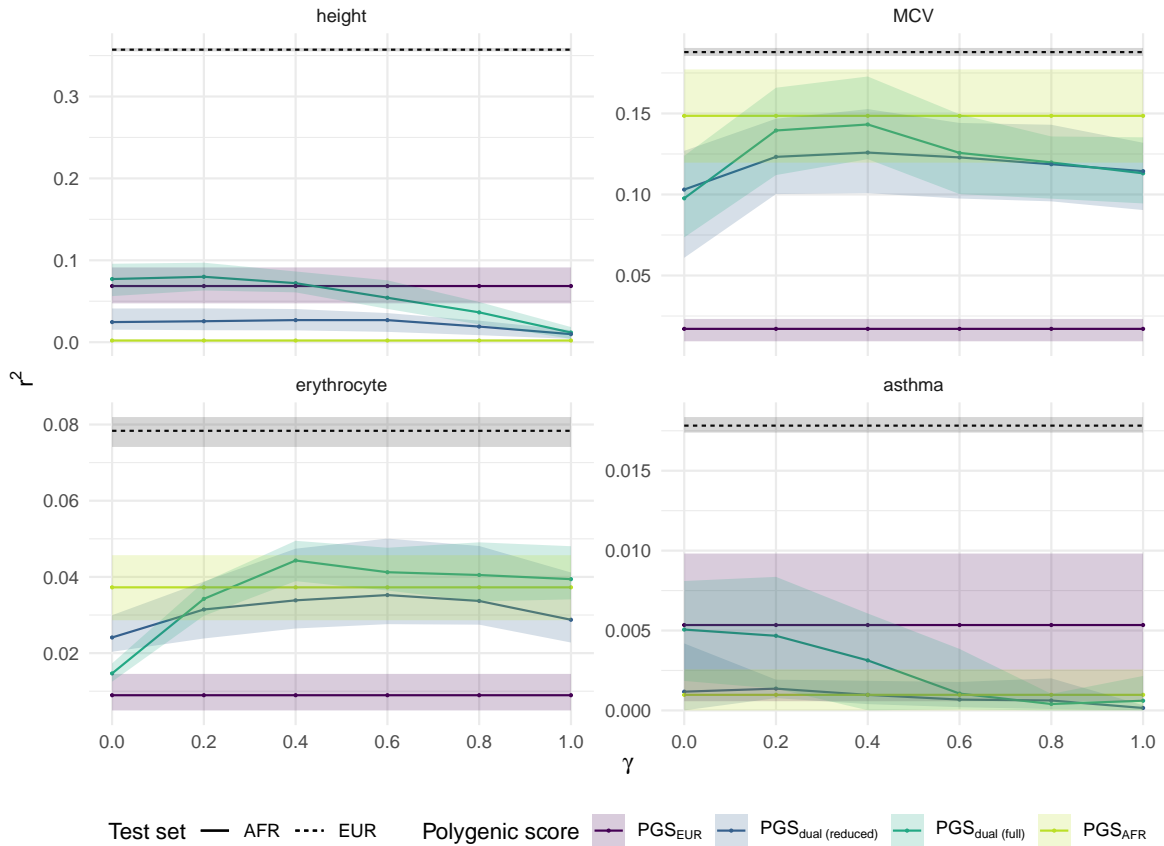

Supplementary Figure 3: **Predictive performance of dual-ancestry PGS constructed using all available European-ancestry and African-ancestry individuals.** The dashed lines correspond to predictive performance on a European-ancestry test set using PGS<sub>EUR</sub>. Predictive performance on an African-ancestry test set is shown by the solid lines. The single-ancestry scores were estimated using a standard, unweighted LASSO. The dual-ancestry scores were constructed using an importance weighted LASSO with various degrees of reweighting  $\gamma$  (see Materials and Methods). Error bars correspond to the range across five cross-validation rounds of training set construction and PGS estimation. The four traits considered are height, mean corpuscular volume (MCV), asthma, and erythrocyte distribution width. PGS<sub>dual (full)</sub> was trained on the union of the African-ancestry and European-ancestry training sets, while PGS<sub>dual (reduced)</sub> was made up of the African-ancestry training set combined with European-ancestry individuals so that the proportion of African-ancestry individuals was 10%.

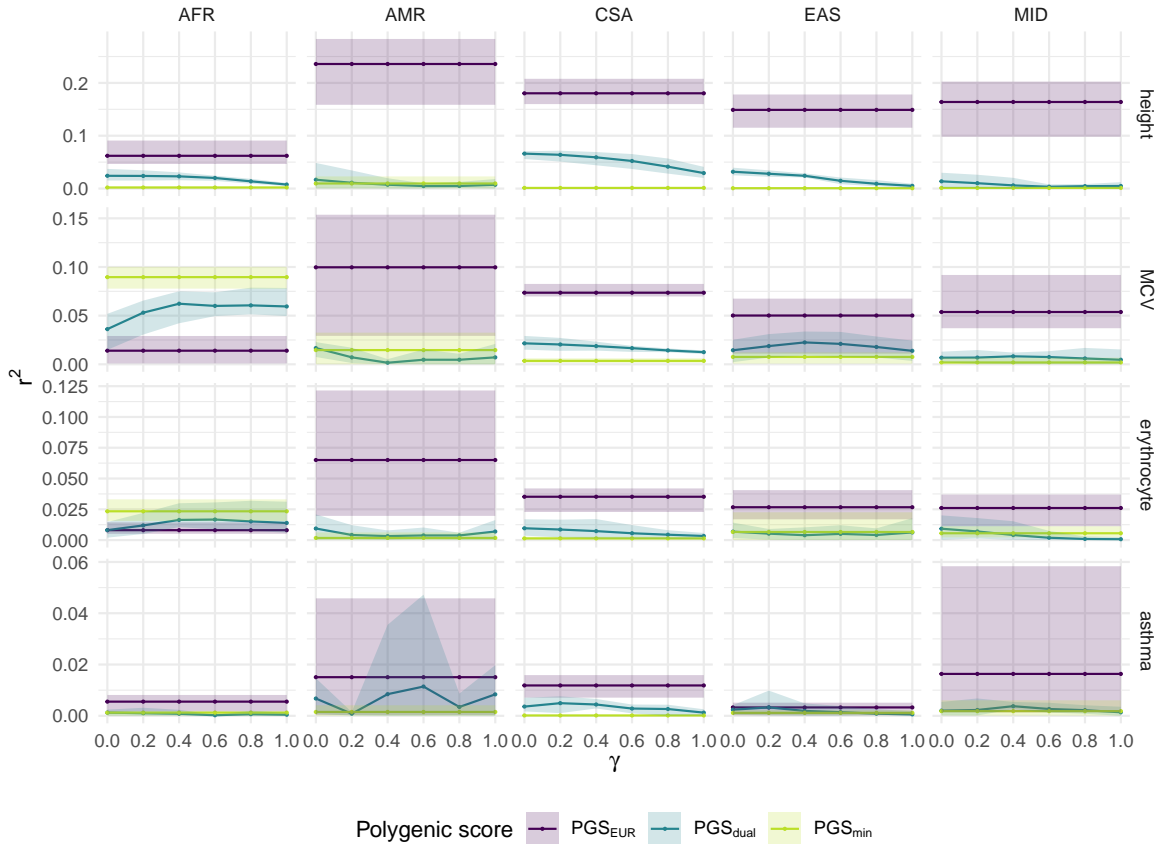

Supplementary Figure 4: **Partial/pseudo  $r^2$  for European-, multi-, and minority-ancestry PGS on four traits in UK Biobank for five minority-ancestry groups using genotyped SNPs only.** The single-ancestry scores were estimated using a standard, unweighted LASSO. The dual-ancestry scores were constructed using an importance weighted LASSO with various degrees of reweighting  $\gamma$  (see Materials and Methods). Error bars correspond to the range across five cross-validation rounds of training set construction and PGS estimation. The four traits considered are height, mean corpuscular volume (MCV), asthma, and erythrocyte distribution width. We used inferred genetic ancestry labels from Pan-UKBB, with participants divided into six groups: European ancestry (EUR), African ancestry (AFR), Admixed American ancestry (AMR), Central/South Asian ancestry (CSA), East Asian ancestry (EAS), and Middle Eastern ancestry (MID).

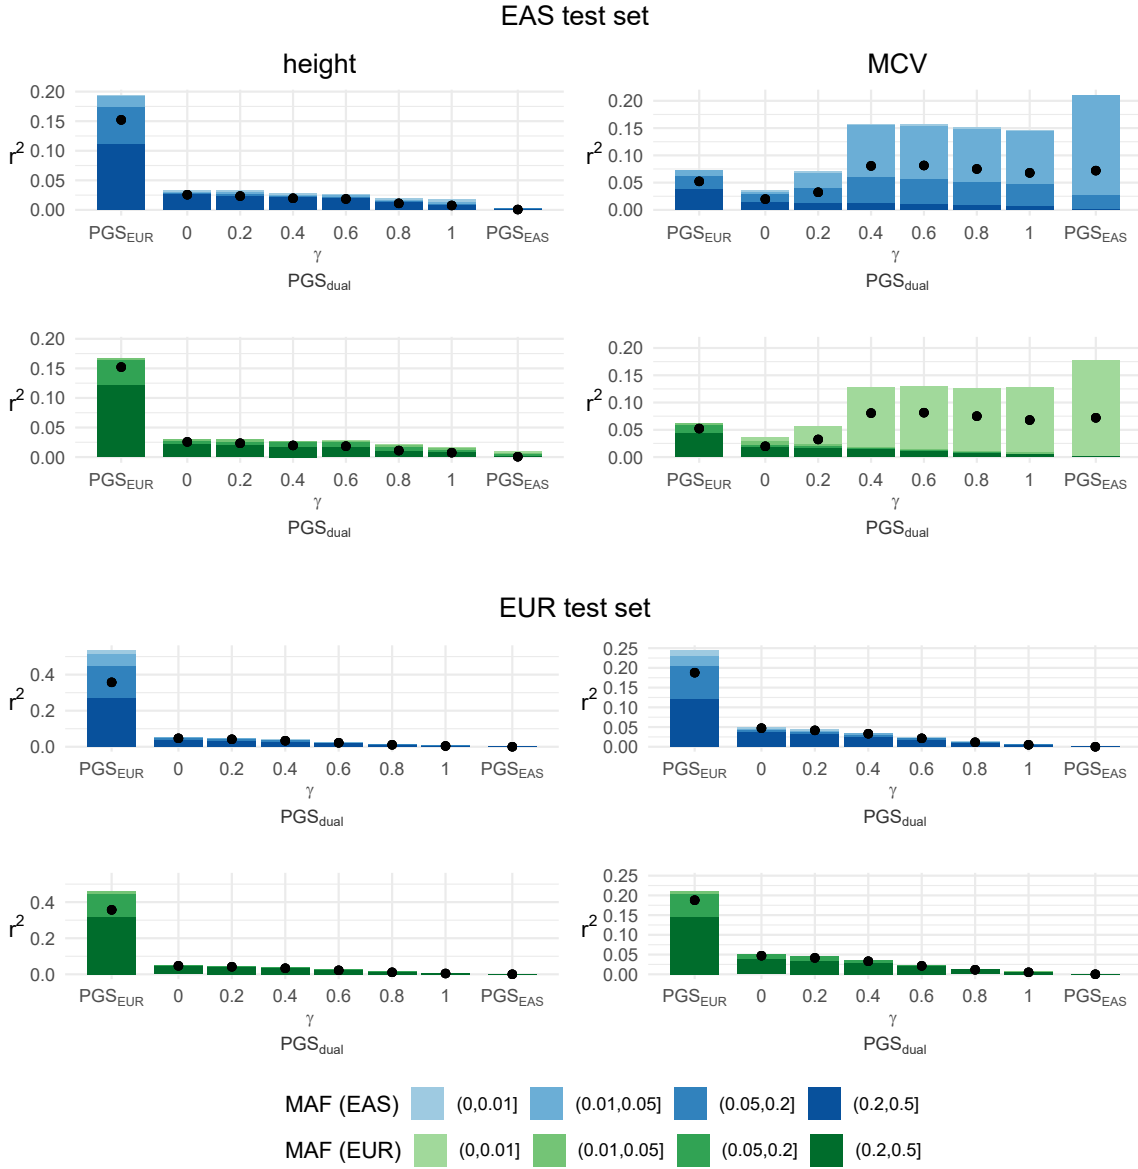

Supplementary Figure 5: Allele frequency composition of variance explained by PGS for height (left) and mean corpuscular volume (right) in an East Asian ancestry test set (top) and a European-ancestry test set (bottom), based on European-, multi-, and minority-ancestry PGS. The single-ancestry scores were estimated using a standard, unweighted LASSO. The dual-ancestry scores were constructed using an importance weighted LASSO with various degrees of reweighting  $\gamma$  (see Materials and Methods). The black dots represent partial  $r^2$  for all the variants, i.e. the entire polygenic score. Variants were grouped according to their minor allele frequency in an East Asian ancestry individuals (blue palette) or in European-ancestry individuals (green palette). Each bar represents the sum of the partial  $r^2$  values for each subset of variants in a given polygenic score. Note that the bars are stacked, and the height of the bar is generally higher than corresponding dot due to linkage disequilibrium between variants.

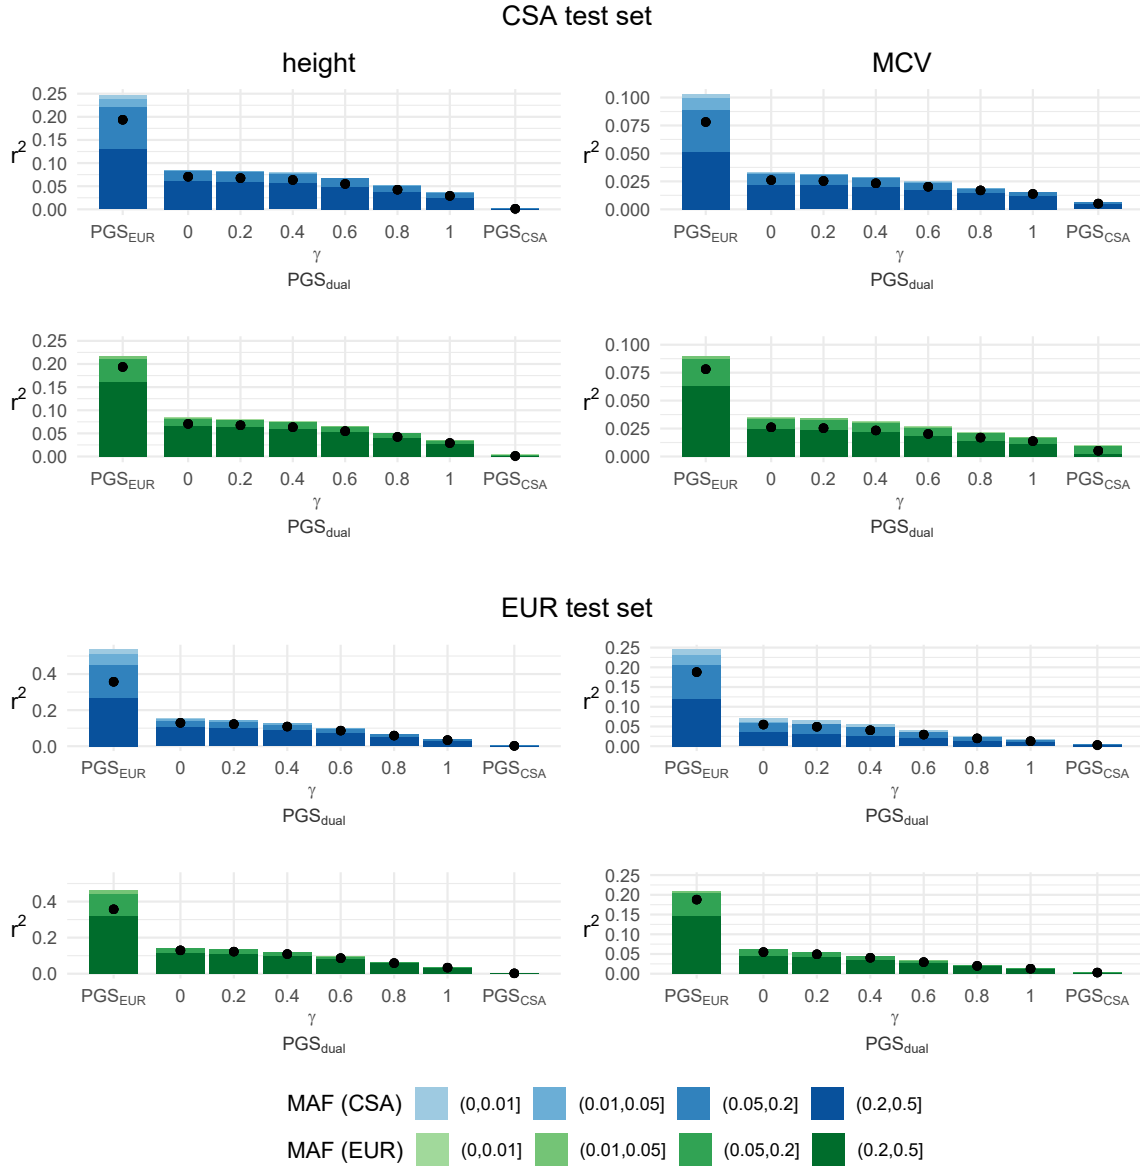

Supplementary Figure 6: Allele frequency composition of variance explained by PGS for height (left) and mean corpuscular volume (right) in a Central/South Asian ancestry test set (top) and a European-ancestry test set (bottom), based on European-, multi-, and minority-ancestry PGS. The single-ancestry scores were estimated using a standard, unweighted LASSO. The dual-ancestry scores were constructed using an importance weighted LASSO with various degrees of reweighting  $\gamma$  (see Materials and Methods). The black dots represent partial  $r^2$  for all the variants, i.e. the entire polygenic score. Variants were grouped according to their minor allele frequency in a Central/South Asian ancestry individuals (blue palette) or in European-ancestry individuals (green palette). Each bar represents the sum of the partial  $r^2$  values for each subset of variants in a given polygenic score. Note that the bars are stacked, and the height of the bar is generally higher than corresponding dot due to linkage disequilibrium between variants.

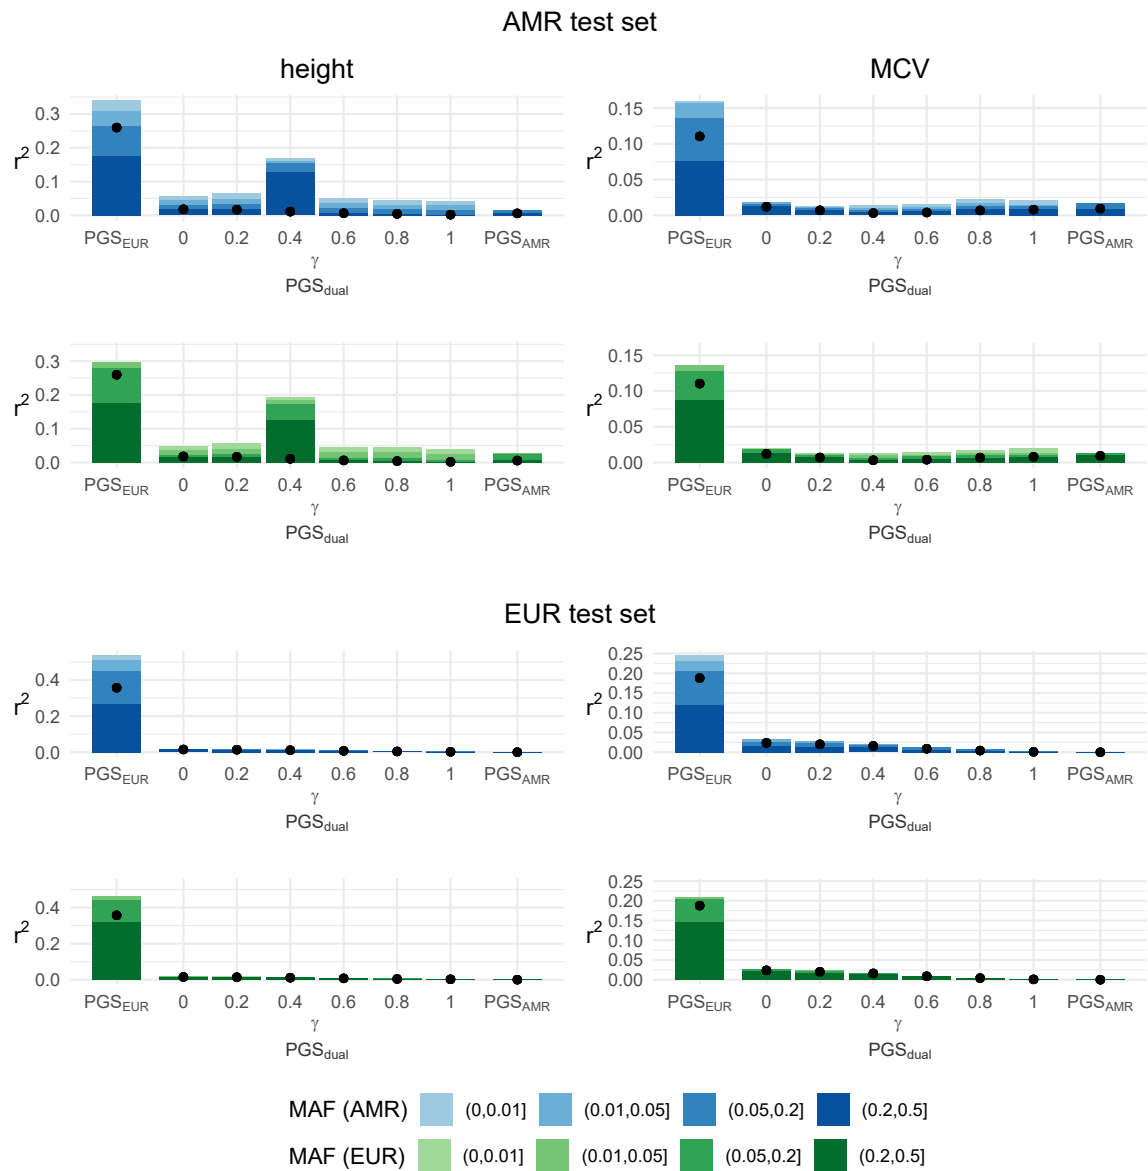

MAF (EUR)

 (0,0.01]

Supplementary Figure 7: Allele frequency composition of variance explained by PGS for height (left) and mean corpuscular volume (right) in an Admixed American ancestry test set (top) and a European-ancestry test set (bottom), based on European-, multi-, and minority-ancestry PGS. The single-ancestry scores were estimated using a standard, unweighted LASSO. The dual-ancestry scores were constructed using an importance weighted LASSO with various degrees of reweighting  $\gamma$  (see Materials and Methods). The black dots represent partial  $r^2$  for all the variants, i.e. the entire polygenic score. Variants were grouped according to their minor allele frequency in an Admixed American ancestry individuals (blue palette) or in European-ancestry individuals (green palette). Each bar represents the sum of the partial  $r^2$  values for each subset of variants in a given polygenic score. Note that the bars are stacked, and the height of the bar is generally higher than corresponding dot due to linkage disequilibrium between variants.

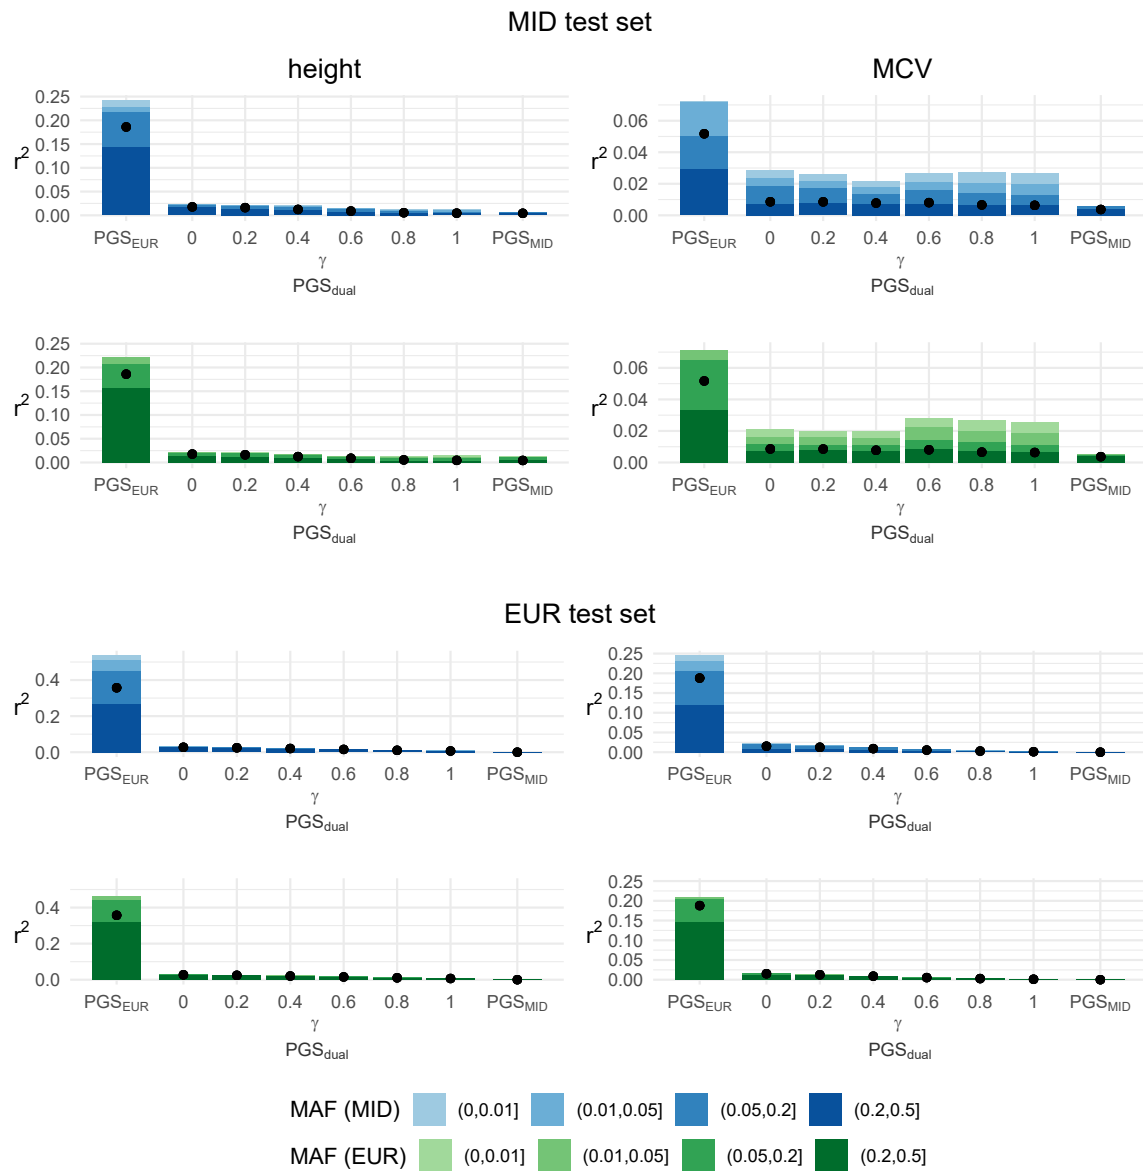

Supplementary Figure 8: Allele frequency composition of variance explained by PGS for height (left) and mean corpuscular volume (right) in a Middle Eastern ancestry test set (top) and a European-ancestry test set (bottom), based on European-, multi-, and minority-ancestry PGS. The single-ancestry scores were estimated using a standard, unweighted LASSO. The dual-ancestry scores were constructed using an importance weighted LASSO with various degrees of reweighting  $\gamma$  (see Materials and Methods). The black dots represent partial  $r^2$  for all the variants, i.e. the entire polygenic score. Variants were grouped according to their minor allele frequency in a Middle Eastern ancestry individuals (blue palette) or in European-ancestry individuals (green palette). Each bar represents the sum of the partial  $r^2$  values for each subset of variants in a given polygenic score. Note that the bars are stacked, and the height of the bar is generally higher than corresponding dot due to linkage disequilibrium between variants.



Supplementary Table 1: Relative variance of polygenic scores across traits and minority ancestry groups. Here,  $\hat{g}_{EUR}^{min}$  denotes the vector of European-ancestry polygenic scores ( $\text{PGS}_{EUR}$ ) for the minority-ancestry test set, while  $\hat{g}_{min}^{EUR}$  denotes the vector of minority-ancestry polygenic scores ( $\text{PGS}_{min}$ ) for the European-ancestry test set. Then,  $\widetilde{\text{Var}}(\hat{g}_{EUR}^{min})$  denotes the sample variance of  $\hat{g}_{EUR}^{min}$  divided by the sample variance of  $\hat{g}_{EUR}^{EUR}$ . The minority ancestry labels correspond to the inferred genetic ancestry labels from Pan-UKBB, with participants divided into six groups: European ancestry (EUR), African ancestry (AFR), Admixed American ancestry (AMR), Central/South Asian ancestry (CSA), East Asian ancestry (EAS), and Middle Eastern ancestry (MID).

| Trait                                 | Minority ancestry | $\widetilde{\text{Var}}(\hat{g}_{EUR}^{min})$ | $\widetilde{\text{Var}}(\hat{g}_{min}^{min})$ | $\widetilde{\text{Var}}(\hat{g}_{min}^{EUR})$ |
|---------------------------------------|-------------------|-----------------------------------------------|-----------------------------------------------|-----------------------------------------------|
| Atrial fibrillation (AFib)            | AFR               | 0.799                                         | 18.327                                        | 13.263                                        |
| Body mass index (BMI)                 | AFR               | 0.578                                         | 0.221                                         | 0.169                                         |
| Diverticular disease of the intestine | AFR               | 0.688                                         | 3.766                                         | 2.935                                         |
| Female genital prolapse               | AFR               | 0.662                                         | 89.554                                        | 74.022                                        |
| Mean corpuscular volume (MCV)         | AFR               | 0.562                                         | 1.722                                         | 0.353                                         |
| Mean corpuscular volume (MCV)         | AMR               | 0.937                                         | 1.388                                         | 1.406                                         |
| Mean corpuscular volume (MCV)         | CSA               | 0.867                                         | 0.350                                         | 0.334                                         |
| Mean corpuscular volume (MCV)         | EAS               | 0.840                                         | 1.125                                         | 0.607                                         |
| Mean corpuscular volume (MCV)         | MID               | 0.884                                         | 0.720                                         | 0.674                                         |
| Mean platelet volume                  | AFR               | 0.543                                         | 0.103                                         | 0.076                                         |
| Asthma                                | AFR               | 0.617                                         | 2.313                                         | 1.762                                         |
| Asthma                                | AMR               | 0.930                                         | 33.283                                        | 35.773                                        |
| Asthma                                | CSA               | 0.904                                         | 4.303                                         | 4.096                                         |
| Asthma                                | EAS               | 0.732                                         | 5.493                                         | 4.666                                         |
| Asthma                                | MID               | 0.921                                         | 11.419                                        | 12.006                                        |
| Eosinophill percentage                | AFR               | 0.614                                         | 0.319                                         | 0.240                                         |
| Erythrocyte distribution width        | AFR               | 0.551                                         | 2.790                                         | 1.110                                         |
| Erythrocyte distribution width        | AMR               | 0.977                                         | 1.986                                         | 2.124                                         |
| Erythrocyte distribution width        | CSA               | 0.937                                         | 0.791                                         | 0.743                                         |
| Erythrocyte distribution width        | EAS               | 0.778                                         | 0.863                                         | 0.709                                         |
| Erythrocyte distribution width        | MID               | 0.937                                         | 1.680                                         | 1.643                                         |
| Height                                | AFR               | 0.545                                         | 0.050                                         | 0.039                                         |
| Height                                | AMR               | 0.928                                         | 0.406                                         | 0.392                                         |
| Height                                | CSA               | 0.818                                         | 0.051                                         | 0.047                                         |
| Height                                | EAS               | 0.672                                         | 0.105                                         | 0.084                                         |
| Height                                | MID               | 0.901                                         | 0.554                                         | 0.577                                         |
| Hypothyroidism                        | AFR               | 0.605                                         | 3.800                                         | 2.882                                         |
| Lymphocyte count                      | AFR               | 0.615                                         | 0.563                                         | 0.423                                         |
| Monocyte count                        | AFR               | 0.612                                         | 0.466                                         | 0.343                                         |
| Platelet crit                         | AFR               | 0.609                                         | 0.283                                         | 0.225                                         |
| High light scatter reticulocyte count | AFR               | 0.674                                         | 0.502                                         | 0.183                                         |
